# Supplementary material for: Ultrahigh voltage direct current quasi-tribovoltaic nanogenerator by switchable tribo-bias induction and deposited charge extraction
Source: Royal Society of Chemistry journal article supplement (doi:10.1039/d4ee01067a), 2024-01-01
Supplement: d4ee01067a1.pdf [file d4ee01067a1.pdf]

Supplementary Information for:

**Ultrahigh voltage direct current quasi-tribovoltaic nanogenerator by switchable tribo-bias induction and deposited charge extraction**

*Xuemei Zhang<sup>a</sup>, Dahu Ren<sup>a</sup>, Huiyuan Wu<sup>a</sup>, Jian Wang<sup>a</sup>, Xiaochuan Li<sup>a</sup>, Huake Yang<sup>a</sup>, Qianying Li<sup>a</sup>, Qianxi Yang<sup>a</sup>, Jinrong Zhu<sup>a</sup>, and Yi Xi<sup>a\*</sup>*

<sup>a</sup> Chongqing Key Laboratory of Soft Condensed Matter Physics and Smart Materials, Department of Applied Physics, Analytical and Testing Center, Chongqing University, Chongqing 400044, P. R. China;

\* Corresponding authors at: [yxi6@cqu.edu.cn](mailto:yxi6@cqu.edu.cn) (Yi Xi)

**Content**

**Supplementary Figures**

**Fig. S1** Hazards and utilization of insulating materials with insulation failure.

**Fig. S2** Photograph of the stator within the sliding type I-Q-TVNG.

**Fig. S3** The formation and effect of tribo-bias in I-Q-TVNG.

**Fig. S4** Output performance of I-Q-TVNG with a slider consisted of NC and Cu electrode.

**Fig. S5** Output performance of I-Q-TVNG with only Cu electrode as the slider.

**Fig. S6** Output current curve under six working circumstances.

**Fig. S7** Output performance of the I-Q-TVNG with a constant voltage source.

**Fig. S8** Selection and evidence of tribo-bias source material.

**Fig. S9** Output performance of contact-separation AC-TENG with different contact materials.

**Fig. S10** Optical image of common triboelectric materials as the charge deposition materials in I-Q-TVNG.

**Fig. S11** Leakage current density of seven fixed charge deposition materials.

**Fig. S12** Output performance of I-Q-TVNG with tribo-bias source material of NC.

**Fig. S13** Output performance of I-Q-TVNG with tribo-bias source material of PC.

- Fig. S14** Relative permittivity and dielectric loss of charge deposition materials.
- Fig. S15** Output performance of free-standing AC-TENG used to determine the triboelectric properties between different materials.
- Fig. S16** Optical photographs of NC and PC.
- Fig. S17** Test of frictional force and friction coefficient between different friction pairs.
- Fig. S18** Leakage current density of PU with different thicknesses.
- Fig. S19** Parameters affecting the output performance of I-Q-TVNG.
- Fig. S20** Structure diagram and output current of I-Q-TVNG with a centrosymmetric slider.
- Fig. S21** Schematic diagram on measuring the voltages of the I-Q-TVNG.
- Fig. S22** Current of rotation-type I-Q-TVNG with different rotating speeds.
- Fig. S23** Output performance of rotation-type I-Q-TVNG.
- Fig. S24** Matching impedance test of I-Q-TVNG at rotating speed of 75 rpm and 150 rpm.
- Fig. S25** Schematic diagram of PMC.
- Fig. S26** Stability test of I-Q-TVNG within 72, 000 cycles.

### **Supplementary Tables**

**Table S1.** Comparison of the output voltage with the latest and most typical TVNGs based on tribovoltaic effect.

**Table S2.** Comparison of the lifetime with the latest and most typical TVNGs based on tribovoltaic effect.

### **Supplementary Videos**

**Supplementary Video 1** Demonstration of the current direction during the operation **Supplementary** with different bias induced materials.

**Supplementary Video 2** Lighting 928LEDs without flashing.

**Supplementary Video 3** Continuously supply power to the hygrometers.

**Supplementary Video 4** Continuously supply power to the scale.

**Supplementary Video 5** Continuously supply power to the smoke alarm.

## Supplementary Figures

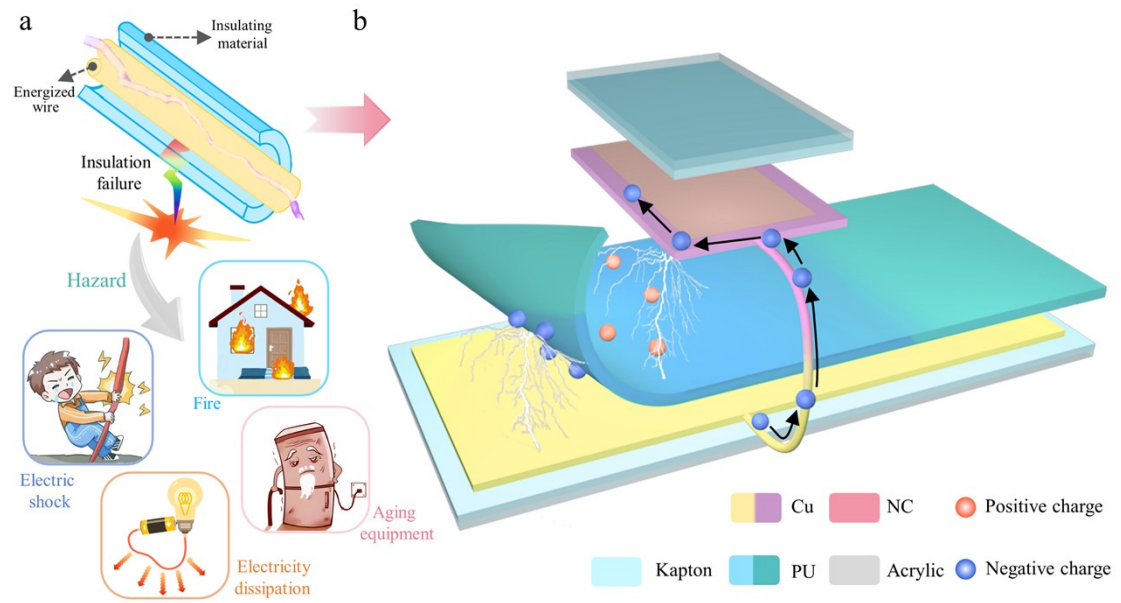

**Fig. S1** Hazards and utilization of insulating materials with insulation failure. (a) Schematic diagram of insulation failure. (b) Conceptual diagram of electron group trajectories in I-Q-TVNG based on the insulation failure of charge deposition material.

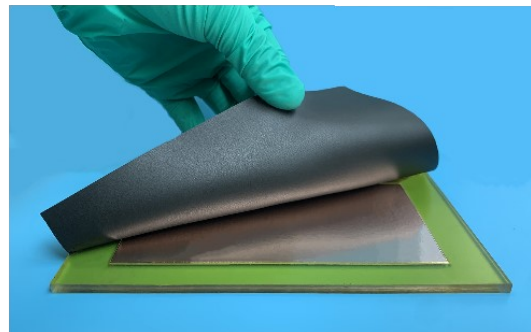

**Fig. S2** Photograph of the stator within the sliding type I-Q-TVNG.

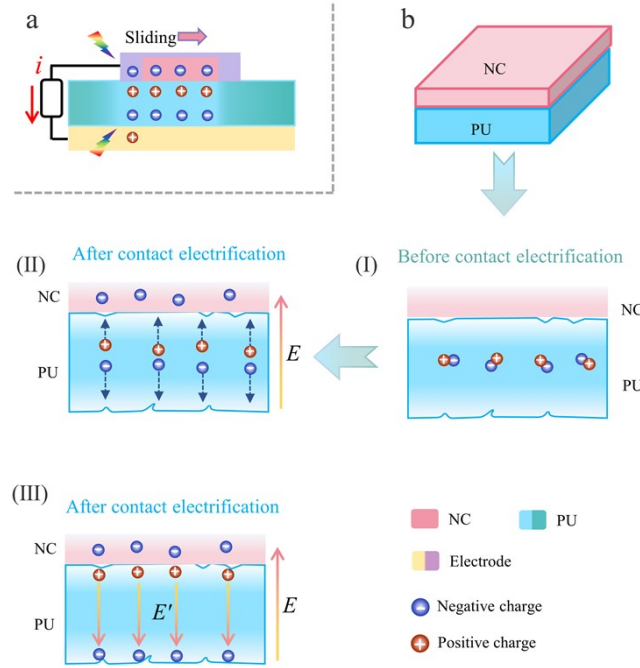

**Fig. S3** The formation and effect of tribo-bias in I-Q-TVNG. (a) Structure diagram of I-Q-TVNG. (b) The electric field effect in the interface of NC and PU. The insert of (I) is the charge distribution inner the PU before contact electrification. The inserts of (II) is the charge enter shifting process after contact electrification, with a tribo-bias ( $E$ ). The inserts of (III) is the forming of build-in electric field ( $E'$ ).

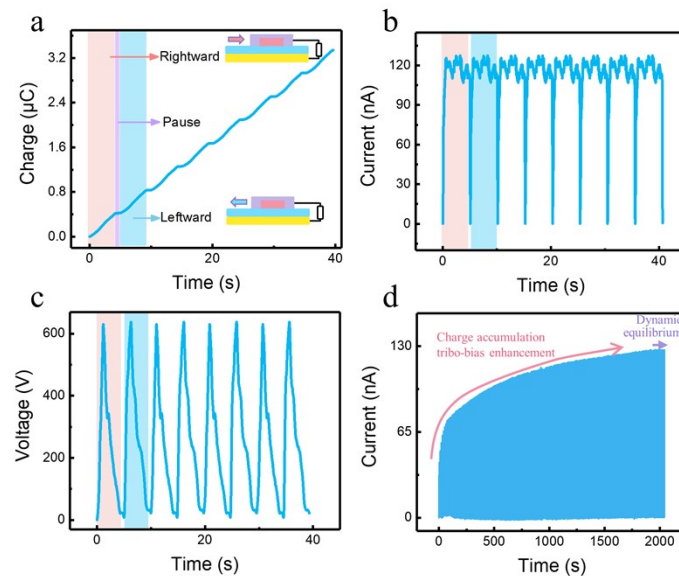

**Fig. S4** Output performance of I-Q-TVNG with a slider consisted of NC and Cu electrode. Output charge (a), current (b), and voltage (c) of the sliding-type device during reciprocating motion (forward-pause-backward). (d) Short-circuit current versus time from initial state to steady state.

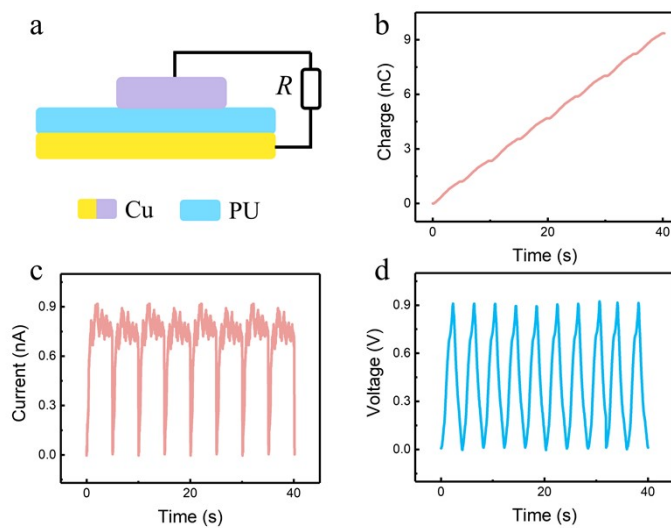

**Fig. S5** Output performance of I-Q-TVNG with only Cu electrode as the slider. Output charge (a), current (b), and voltage (c) of the device during reciprocating motion.

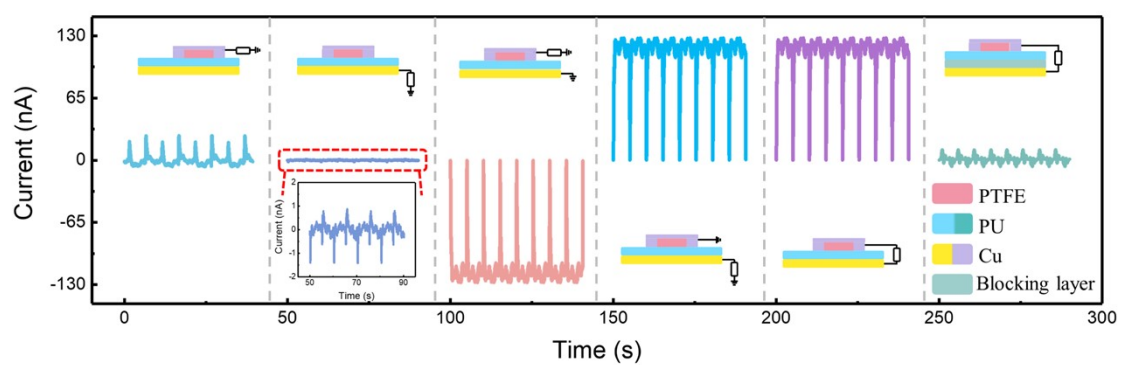

**Fig. S6** Output current curve under six working circumstances.

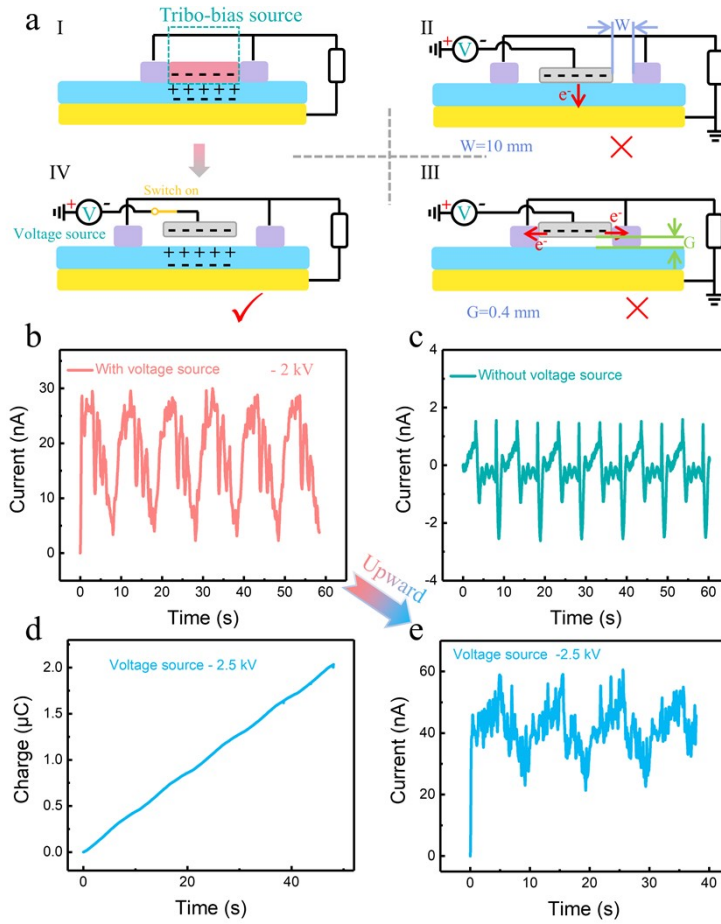

**Fig. S7** Output performance of the I-Q-TVNG with a constant voltage source. (a) Location selection of the constant voltage source. (b) Output charge of the device under induced voltage of -2 kV. (c) Output charge of the device without constant voltage source. Output charge (d) and current (e) of the device under voltage of -2.5 kV.

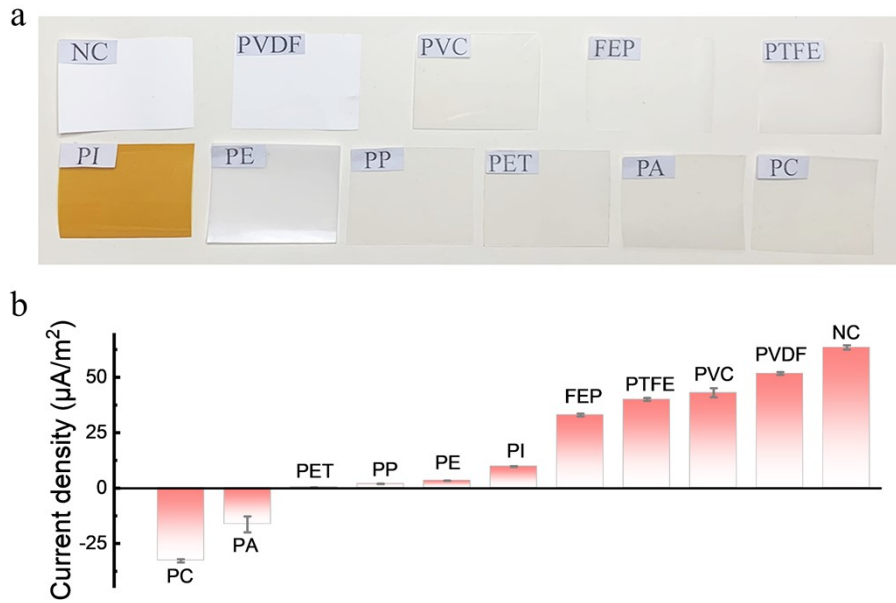

**Fig. S8** Selection and evidence of tribo-bias source material. (a) Optical image of common triboelectric materials as the tribo-bias source material in I-Q-TVNG. (b) Current density of I-Q-TVNG with different the tribo-bias source materials.

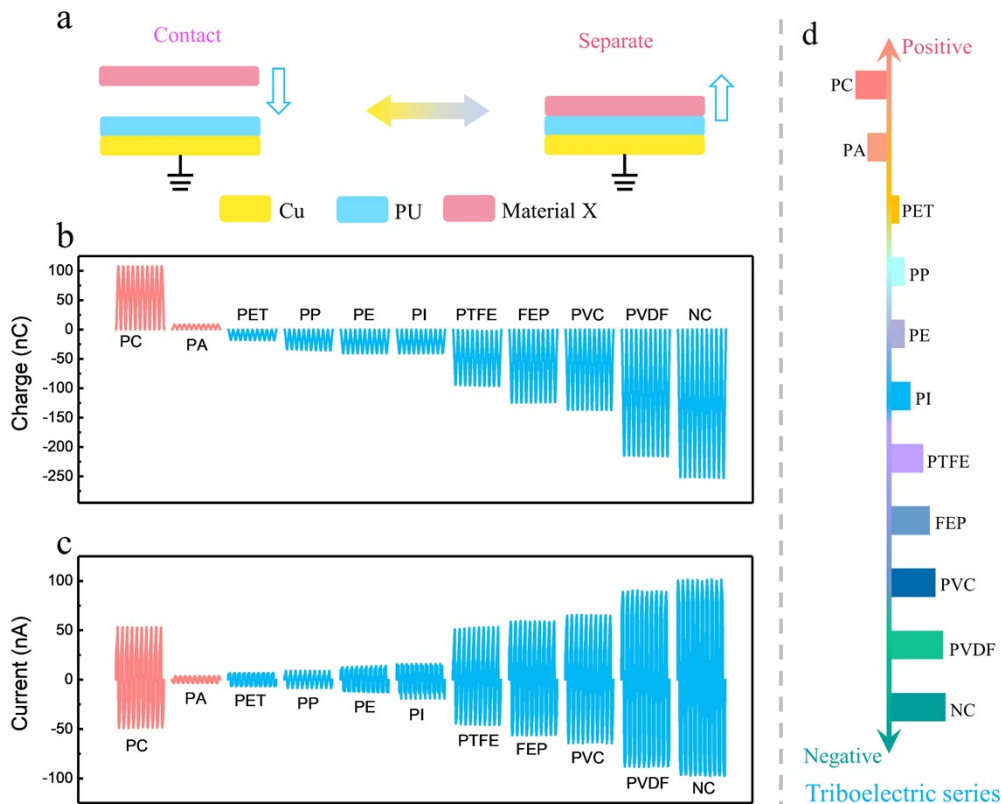

**Fig. S9** Output performance of contact-separation AC-TENG with different contact materials. (a) Schematic diagram of the contact-separation TENG. Output charge (b) and (c) current of AC-TENG with different contact materials. (d) The quantified triboelectric series.

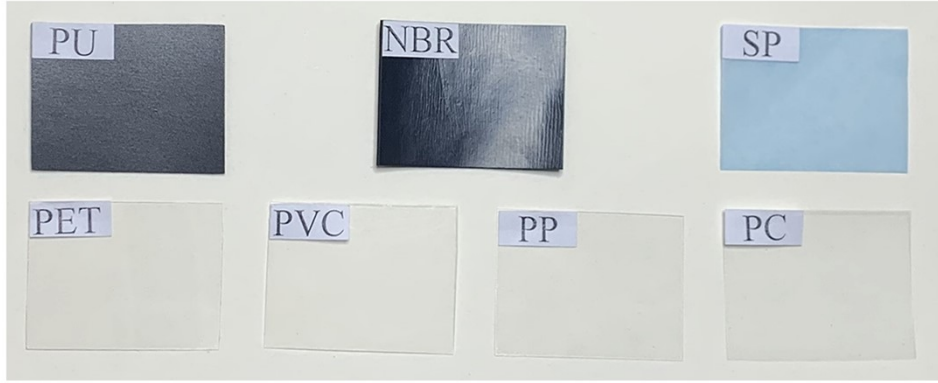

**Fig. S10** Optical image of common triboelectric materials as the charge deposition materials in I-Q-TVNG.

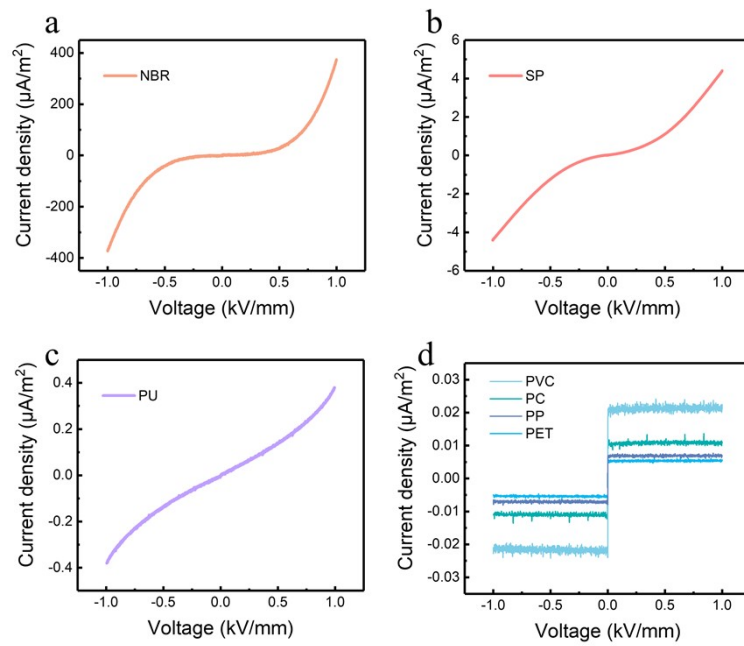

**Fig. S11** Leakage current density of seven fixed charge deposition materials. Leakage current density of seven fixed charge deposition materials, NBR (a), SP (b), PU (c), and PC, PVC, PET, PP (d).



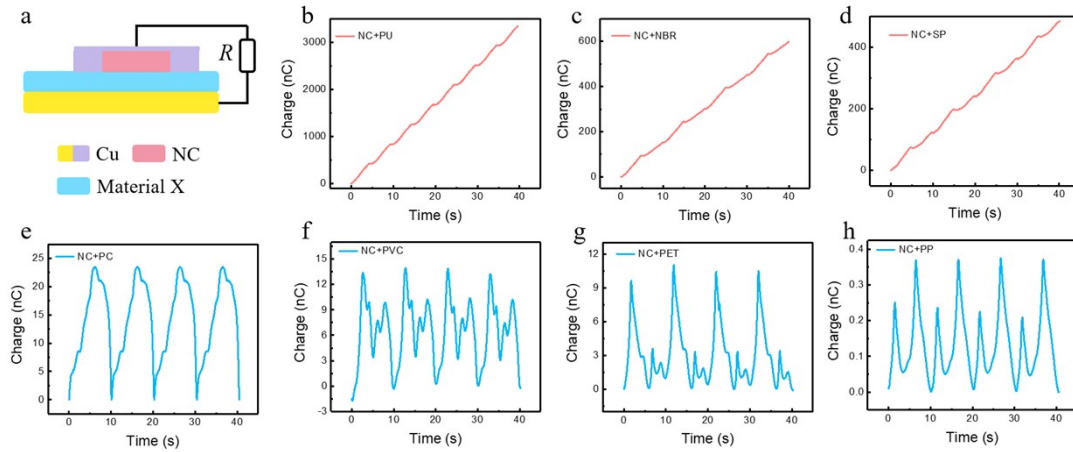

**Fig. S12** Output performance of I-Q-TVNG with tribo-bias source material of NC. (a) Structure schematic of I-Q-TVNG with tribo-bias source material of NC. Output charge of I-Q-TVNG with different fixed charge deposition materials of PU (b), NBR (c), SP (d), PC (e), PVC (f), PET (g), and PP (h).

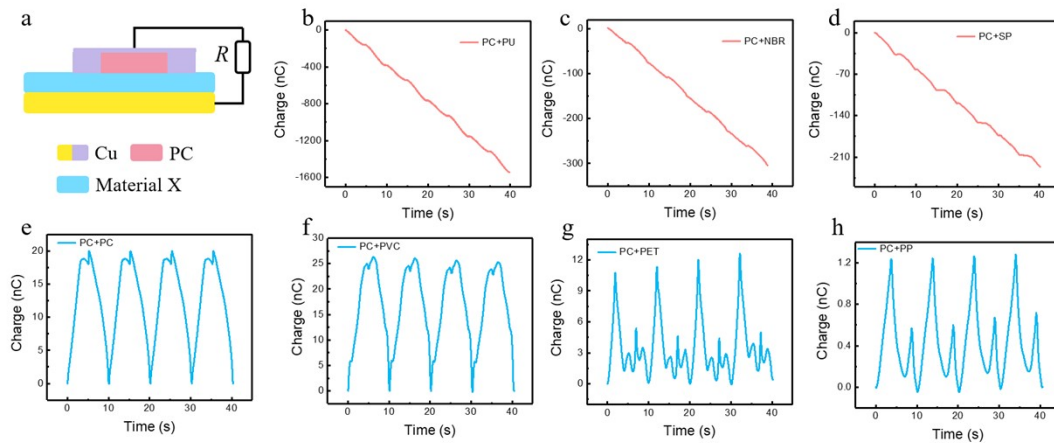

**Fig. S13** Output performance of I-Q-TVNG with tribo-bias source material of PC. (a) Structure schematic of I-Q-TVNG with tribo-bias source material of PC. Output charge of I-Q-TVNG with different fixed charge deposition materials of PU (b), NBR (c), SP (d), PC (e), PVC (f), PET (g), and PP (h).

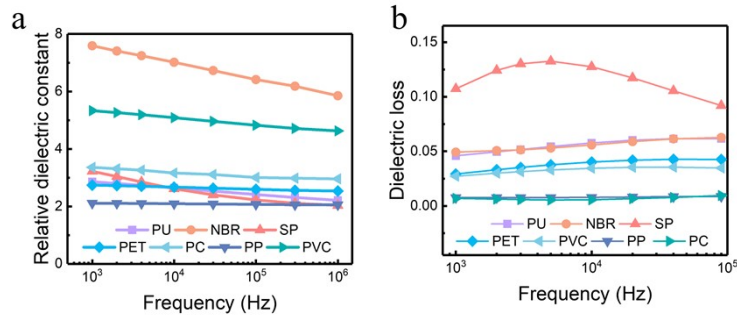

**Fig. S14** Relative permittivity and dielectric loss of charge deposition materials. Relative permittivity (a) and dielectric loss (b) of the seven fixed charge deposition materials.

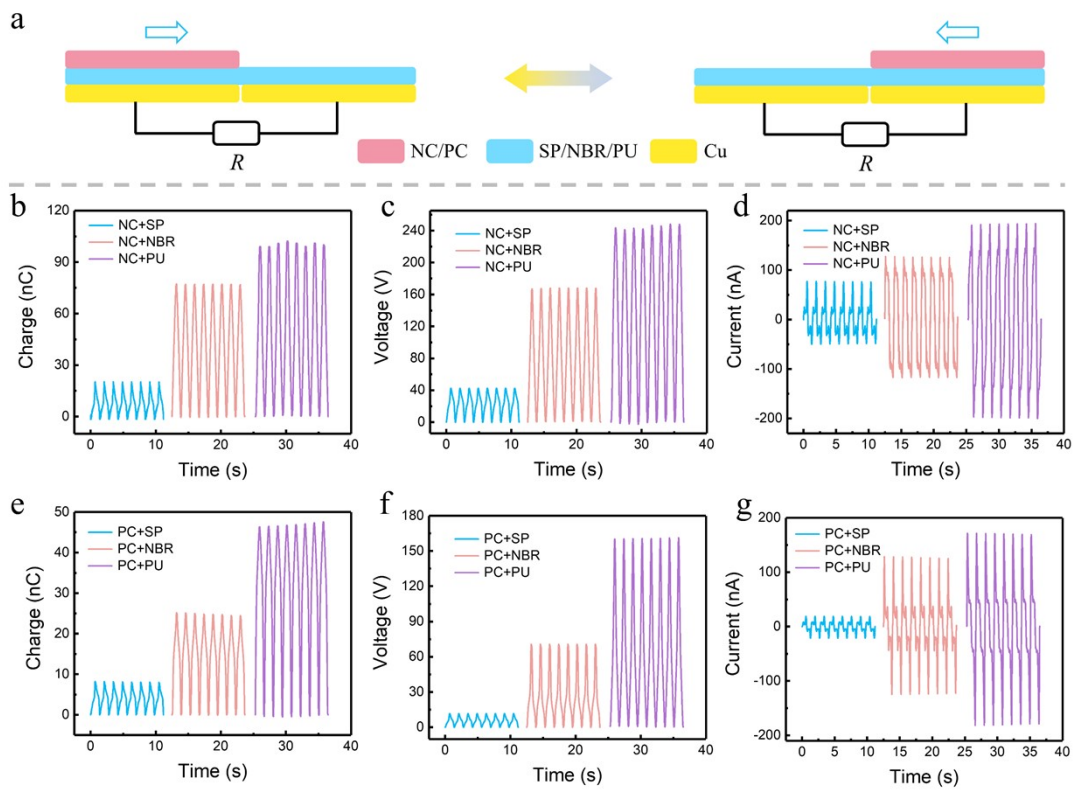

**Fig. S15** Output performance of free-standing AC-TENG used to determine the triboelectric properties between different materials. (a) Schematic diagram of the free-standing TENG. Output charge (b), voltage (c), and current (d) of free-standing TENG with slider of NC and different charge deposition materials. Output charge (e), voltage (f), and current (g) of free-standing TENG with slider of PC and different charge deposition materials.

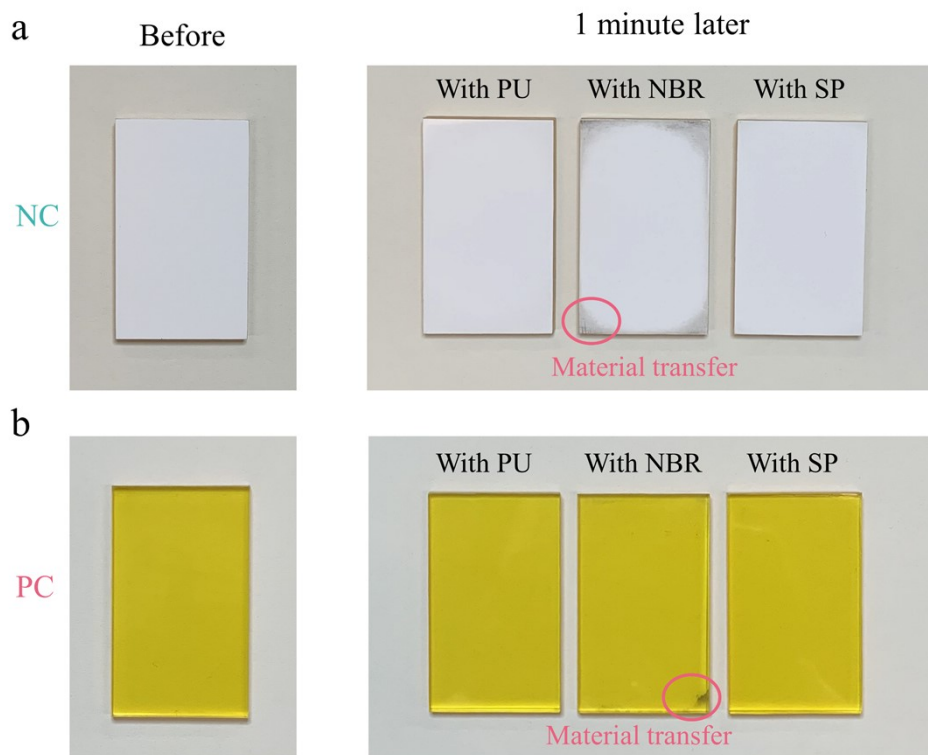

**Fig. S16** Optical photographs of NC and PC. (a) Photos of NC before and after 1-minute cycle test with PU, NBR, and SP. (b) Photos of PC before and after 1-minute cycle test with PU, NBR, and SP.

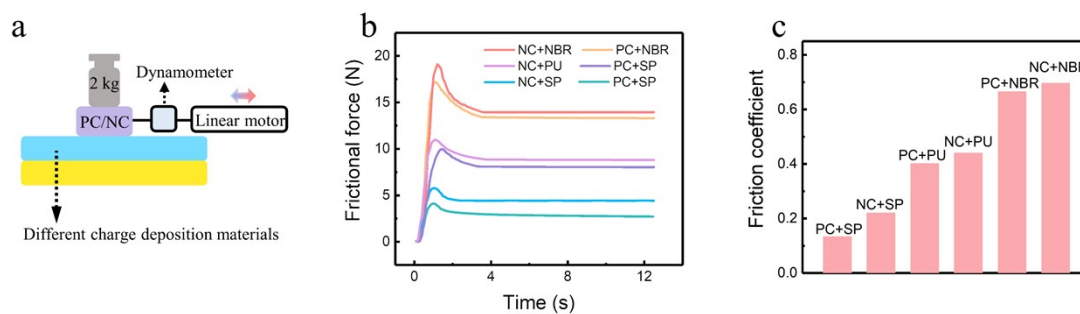

**Fig. S17** Test of frictional force and friction coefficient between different friction pairs. (a) Schematic diagram of testing the frictional force of different charge deposition materials tested at a pressure of 20 N. (b) Frictional force and (c) friction coefficient between different friction pairs.

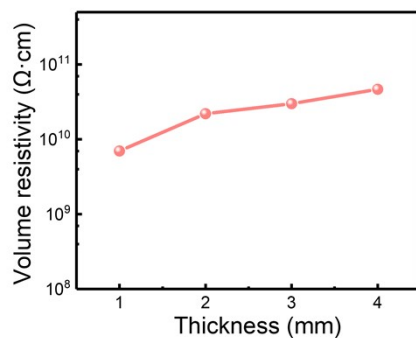

**Fig. S18** Leakage current density of PU with different thicknesses.

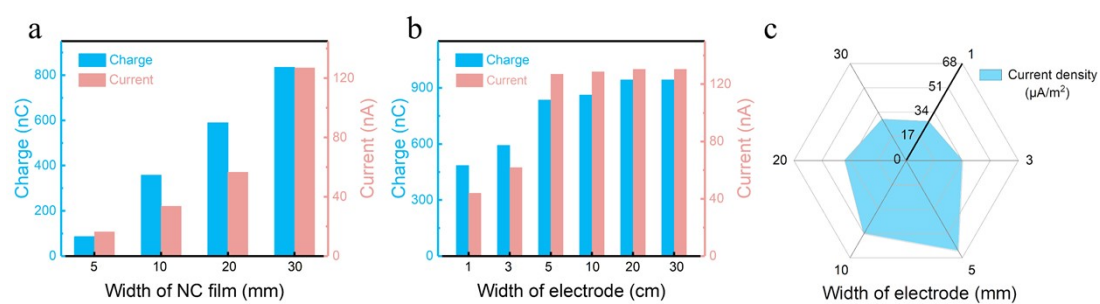

**Fig. S19** Parameters affecting the output performance of I-Q-TVNG. Output performance of the device with different widths of NC film (a), and widths of top electrode (b). (c) Current density of I-Q-TVNG with different widths of top electrode.

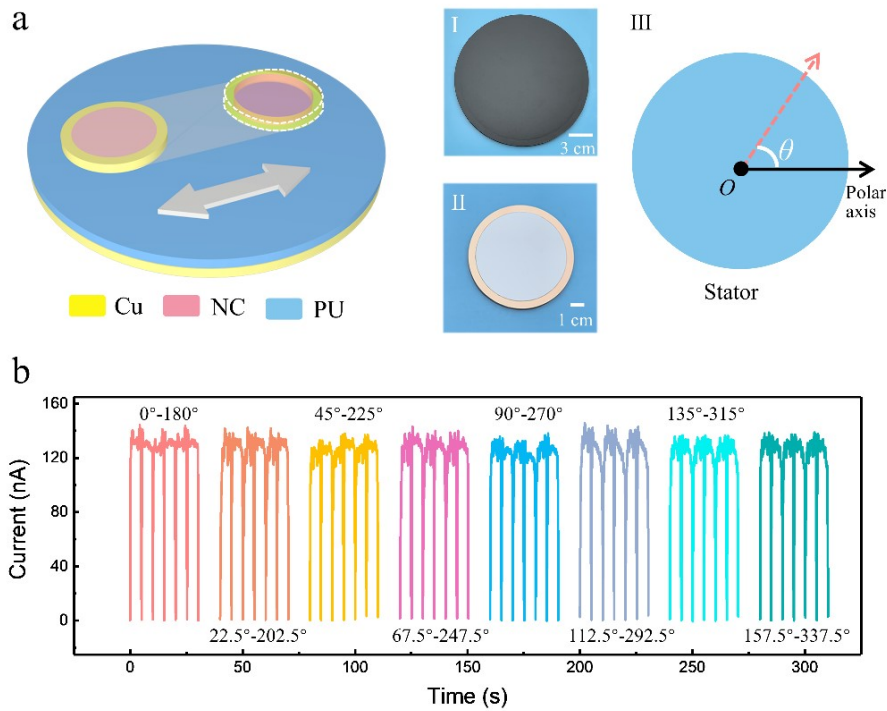

**Fig. S20** Structure diagram and output current of I-Q-TVNG with a centrosymmetric slider. (a) Structure illustration of I-Q-TVNG with a centrosymmetric slider. The insert of (I) and (II) are the digital images of the stator and the slider, respectively. The insert of (III) is the defined polar coordinate system. The central position of stator is point  $O$  (called as pole), and the horizontal ray from this point  $O$  is the polar axis. The polar angle  $\theta$  measures the angle from the polar axis to the sliding direction of slider (the pink dotted arrow) in a counterclockwise direction. (b) Output current of the I-Q-TVNG under different sliding directions.

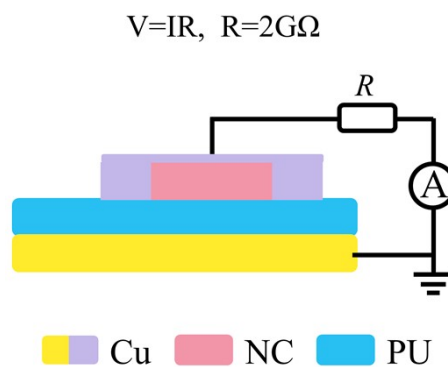

**Fig. S21** Schematic diagram on measuring the voltages of the I-Q-TVNG.

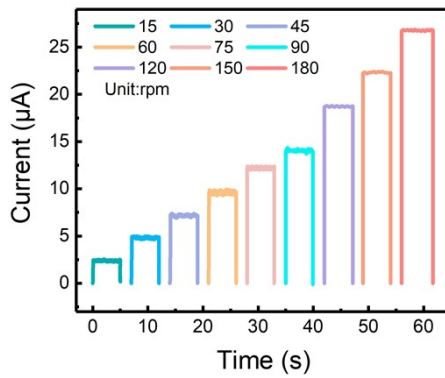

**Fig. S22** Current of rotation-type I-Q-TVNG with different rotating speeds.

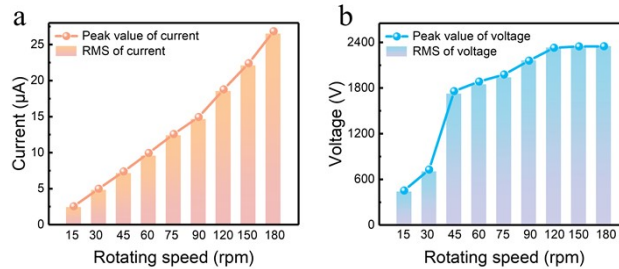

**Fig. S23** Output performance of rotation-type I-Q-TVNG. (b) Peak current and RMS of steady current of I-Q-TVNG with different rotating speeds. (c) Peak voltage and RMS of steady voltage of I-Q-TVNG with different rotating speeds.

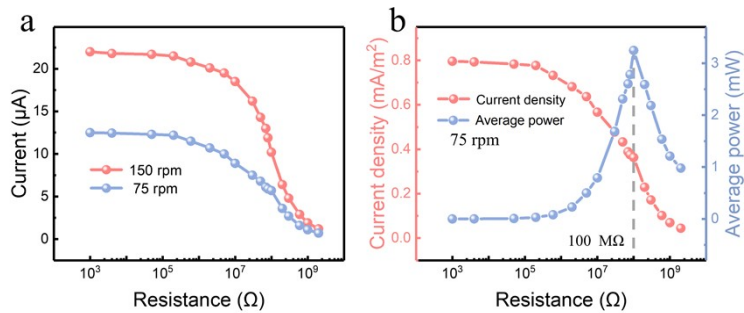

**Fig. S24** Matching impedance test of I-Q-TVNG at rotating speed of 75 rpm and 150 rpm. (a) Current of the device under various external loads. (b) Current density and power at 75 rpm.

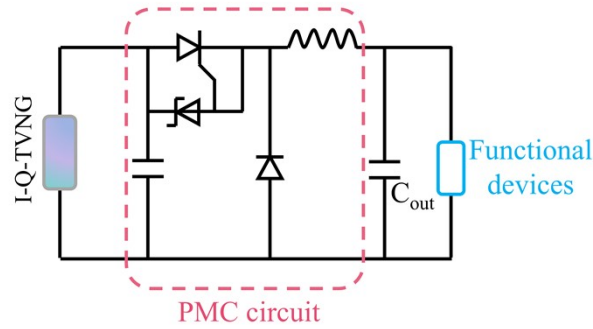

**Fig. S25** Schematic diagram of PMC.

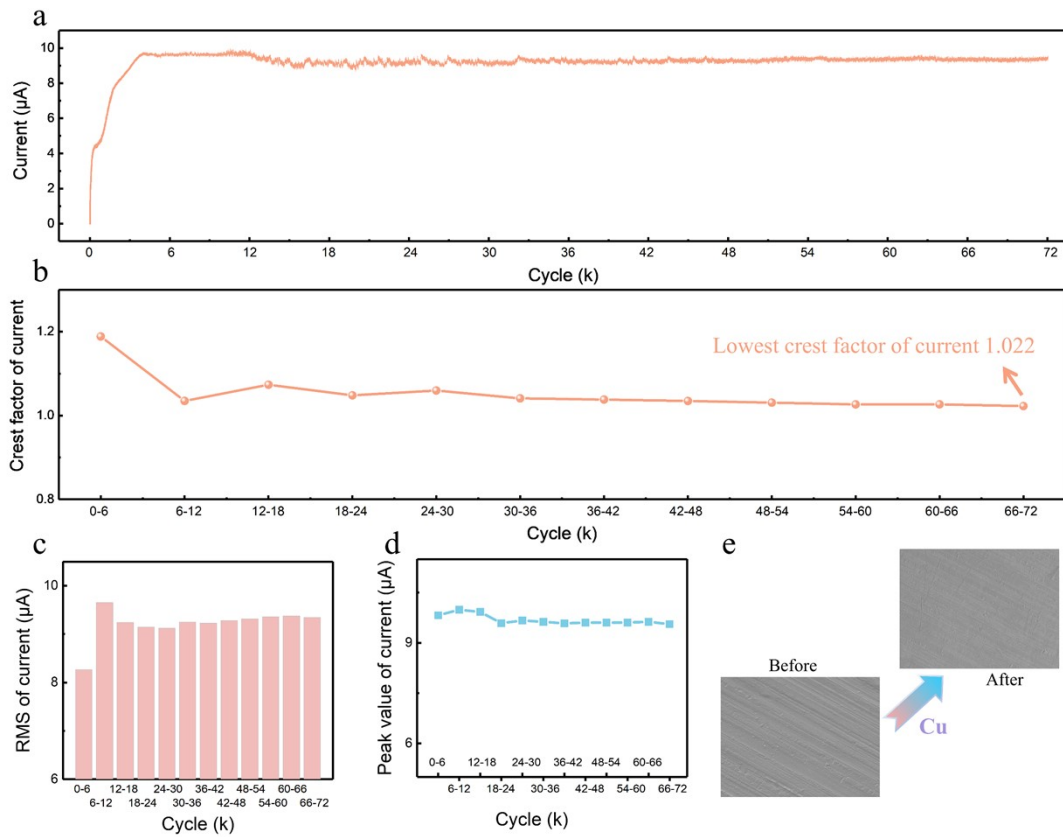

**Fig. S26** Stability test of I-Q-TVNG within 72, 000 cycles. Current output (a), crest factor of current (b), peak current (c), and RMS of steady current (d) of I-Q-TVNG over 72, 000 cycles. (e) SEM images of top Cu electrode at initial and after 72, 000 cycles of continuous testing.

## Supplementary Tables

**Table S1.** Comparison of the output voltage with the latest and most typical TVNGs based on tribovoltaic effect.<sup>1-16</sup>

| Reference | Journals                         | Materials                              | Output voltage (V) |
|-----------|----------------------------------|----------------------------------------|--------------------|
| [1]       | Advanced Energy Materials        | Steel/N-Si                             | 0.02               |
| [2]       | Advanced Energy Materials        | Steel/P-Si/N-Si                        | 0.09               |
| [3]       | Nano Micro Letter                | Cu/Si/Au                               | 0.227              |
| [4]       | Advanced Functional Materials    | Cu/P-Si                                | 0.25               |
| [5]       | Advanced Energy Materials        | Conductive fabric/N-fabric             | 0.28               |
| [6]       | Energy Environmental Science     | Al/N-Si                                | 0.3                |
| [7]       | Nano Energy                      | PEDOT:PSS /Al                          | 0.6                |
| [8]       | Advanced Functional Materials    | Pt/H <sub>2</sub> O/IGZO               | 0.62               |
| [9]       | Energy Environmental Science     | Al/Polypyrrole/Au                      | 1.06               |
| [10]      | Advanced Energy Materials        | Al/CsPbBr <sub>3</sub> /ITO            | 3.69               |
| [11]      | Journal of Materials Chemistry A | Al/PVP/Si                              | 20                 |
| [12]      | Advanced Materials               | PBi <sub>2</sub> Te <sub>3</sub> /NGaN | 40                 |
| [13]      | Energy Environmental Science     | PTFE/Nylon/Si/Cu                       | 80                 |
| [14]      | Advanced Energy Materials        | Si/GaN                                 | 90                 |
| [15]      | Energy Environmental Science     | P-Si/N-GaN                             | 130                |
| [16]      | Advanced Energy Materials        | Steel/uGaN                             | 130                |
| This work |                                  | NC/PU/Cu                               | 2324               |

**Table S2.** Comparison of the lifetime with the latest and most typical TVNGs based on tribovoltaic effect.<sup>3, 9, 17-19</sup>

| Reference | Journals                      | Strategy              | Cycles (k) | Output retention ratio (%) | Attenuation rate per 1 k cycles (%) |
|-----------|-------------------------------|-----------------------|------------|----------------------------|-------------------------------------|
| [17]      | Advanced Functional Materials | Interface Lubrication | 30         | 95                         | 0.168                               |
| [18]      | Advanced Functional Materials | Material modification | 43         | 81.97                      | 0.419                               |
| [19]      | Advanced Materials            | Material modification | 20         | 85.29                      | 0.736                               |
| [3]       | Nano Micro Letter             | Interface Lubrication | 90         | 90                         | 1                                   |
| [9]       | Energy Environmental Science  | Soft contact          | 20         | 0.5 %                      | 4.975                               |
| This work | \                             | Soft contact          | 72         | 97.1                       | 0.040                               |



## References

1. Z. Zhang, D. Jiang, J. Zhao, G. Liu, T. Bu, C. Zhang and Z. L. Wang, *Adv. Energy Mater.*, 2020, **10**.
2. S. Dong, T. Bu, Z. Wang, Y. Feng, G. Liu, J. Zeng, Z. Wang, J. Cao, Z. Zhang, F. Liu and C. Zhang, *Adv. Energy Mater.*, 2023, **13**.
3. W. Qiao, L. Zhou, Z. Zhao, P. Yang, D. Liu, X. Liu, J. Liu, D. Liu, Z. L. Wang and J. Wang, *Nano-Micro Lett.*, 2023, **15**.
4. L. Gong, Z. Wang, R. Luan, G. Liu, B. Fan, Y. Feng, J. Cao, Y. Qi, Z. Zhang and C. Zhang, *Adv. Funct. Mater.*, 2023, 2310703.
5. T. Lv, R. Cheng, C. Wei, E. Su, T. Jiang, F. Sheng, X. Peng, K. Dong and Z. L. Wang, *Adv. Energy Mater.*, 2023, **13**.
6. X. Xu, Z. L. Wang and Z. Yang, *Energy Environ. Sci.*, 2024, **17**, 149-157.
7. Z. y. You, X. Wang, F. Lu, S. Wang, B. Hu, L. Li, W. Fang and Y. Liu, *Nano Energy*, 2023, **109**.
8. Y. Huang, D. Liu, X. Gao, J. Zhu, Y. Zhang and M. Zhang, *Adv. Funct. Mater.*, 2022, **33**.
9. J. Meng, C. Pan, L. Li, Z. H. Guo, F. Xu, L. Jia, Z. L. Wang and X. Pu, *Energy Environ. Sci.*, 2022, **15**, 5159-5167.
10. H. Yuan, Z. Xiao, J. Wan, Y. Xiang, G. Dai, H. Li and J. Yang, *Adv. Energy Mater.*, 2022, **12**.
11. X. Pan, H. Xiang, Z. Xuan, Y. Jie and X. Cao, *J. Mater. Chem. A*, 2023, **11**, 25377-25385.
12. Z. Zhang, Z. Wang, Y. Chen, Y. Feng, S. Dong, H. Zhou, Z. L. Wang and C. Zhang, *Adv. Mater.*, 2022, **34**.
13. C. Pan, L. N. Y. Cao, J. Meng, L. Jia, W. Hu, Z. L. Wang and X. Pu, *Energy Environ. Sci.*, 2024, **17**, 1132
14. S. Qin, J. Chen, P. Yang, Z. Liu, X. Tao, X. Dong, J. Hu, X. Chu, Z. L. Wang and X. Chen, *Adv. Energy Mater.*, 2023, **14**.
15. Z. Wang, Z. Zhang, Y. Chen, L. Gong, S. Dong, H. Zhou, Y. Lin, Y. Lv, G. Liu and C. Zhang, *Energy Environ. Sci.*, 2022, **15**, 2366-2373.
16. Z. Zhang, N. Wu, L. Gong, R. Luan, J. Cao and C. Zhang, *Adv. Mater.*, 2024, **36**.
17. W. Qiao, Z. Zhao, L. Zhou, D. Liu, S. Li, P. Yang, X. Li, J. Liu, J. Wang and Z. L. Wang, *Adv. Funct. Mater.*, 2022, **32**.
18. B. Fan, Z. Wang, G. Liu, Z. Wang, X. Fu, L. Gong and C. Zhang, *Adv. Funct. Mater.*, 2023, **33**.
19. F. Jiang, G. Thangavel, X. Zhou, G. Adit, H. Fu, J. Lv, L. Zhan, Y. Zhang and P. S. Lee, *Adv. Mater.*, 2023, **35**.
